# Supplementary material
Source: publisher figshare collection journal article supplement (https://frontiersin.figshare.com/ndownloader/files/36093350)
Supplement: Supplementary file 1 [file 36093350]

## Supporting information

**Quillfeldt et al.:** Variation among species and populations, and carry-over effects of winter exposure on mercury accumulation in small petrels

**Fig. S1.** Core moult period in tracked Blue petrels, Thin-billed prions and Antarctic prions, based on immersion data.

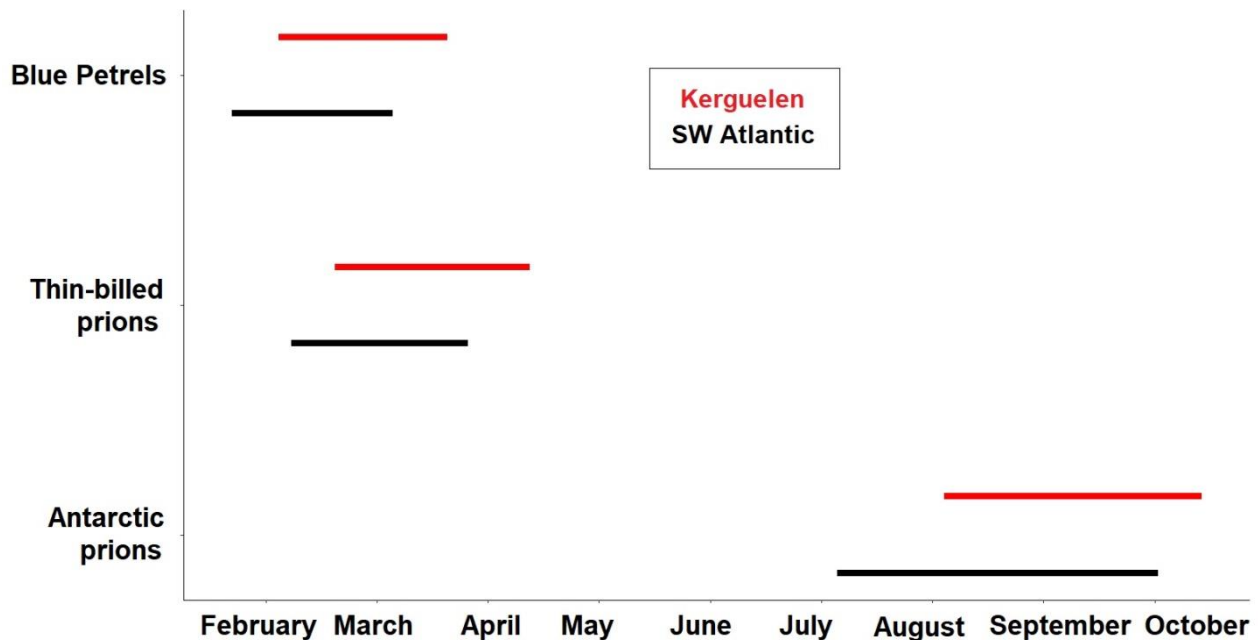

**Table S1.** Mean start, end and duration of the core moult period in Blue Petrels (BP), Thin-billed Prions (TBP) and Antarctic Prions (AP), based on immersion data.

| Population       | N  | Duration |             |              |            |            |
|------------------|----|----------|-------------|--------------|------------|------------|
|                  |    | (days)   | Start (min) | Start (mean) | End (mean) | End (max)  |
| BP_Kerguelen     | 16 | 46.6     | 07.02.2012  | 18.02.2012   | 04.04.2012 | 13.04.2012 |
| BP_South Georgia | 10 | 43.4     | 18.01.2011  | 05.02.2011   | 21.03.2011 | 28.03.2011 |
| TBP_Kerguelen    | 20 | 53.5     | 12.02.2012  | 04.03.2012   | 26.04.2012 | 18.05.2012 |
| TBP_New Island   | 40 | 48.5     | -           | -            | -          | -          |
| 2010             | 20 | 47.2     | 06.02.2010  | 24.02.2010   | 11.04.2010 | 10.05.2010 |
| 2011             | 13 | 48.9     | 31.01.2011  | 24.02.2011   | 13.04.2011 | 25.05.2011 |
| 2013             | 7  | 51.7     | 08.02.2013  | 12.02.2013   | 03.04.2013 | 18.04.2013 |
| AP_Kerguelen     | 11 | 70.6     | 06.08.2012  | 16.08.2012   | 24.10.2012 | 13.11.2012 |
| AP_South Georgia | 7  | 87.8     | 30.05.2011  | 19.07.2011   | 14.10.2011 | 28.10.2011 |

**Fig. S2.** Year-round latitudinal and longitudinal distribution of Blue Petrels from different breeding colonies.

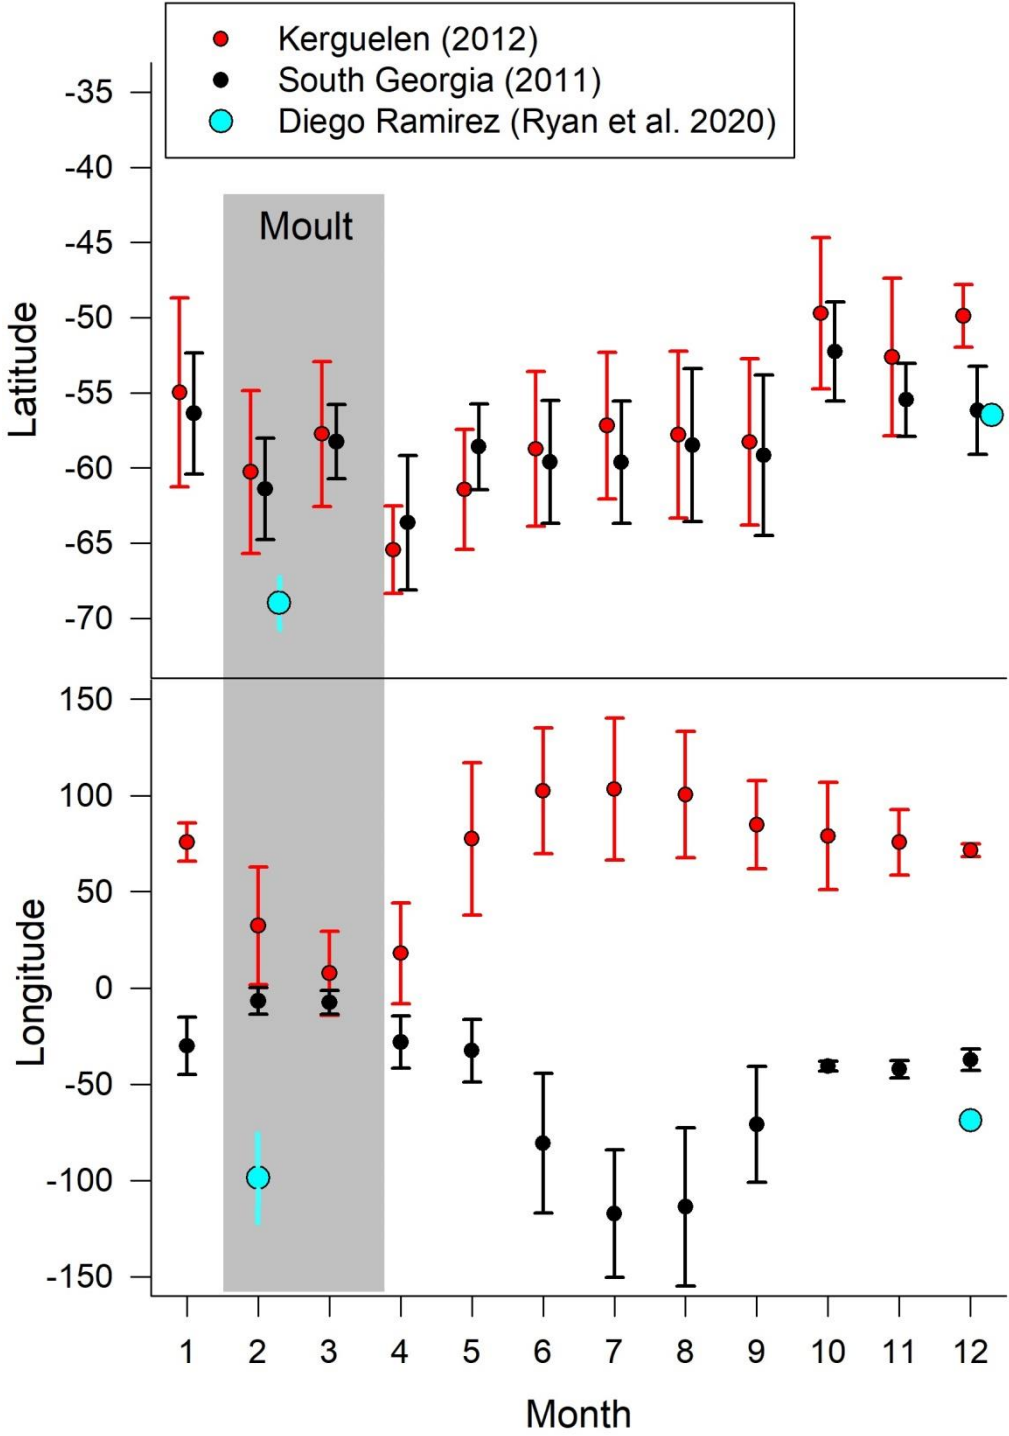

**Fig. S3.** Year-round latitudinal and longitudinal distribution of Thin-billed Prions from different breeding colonies.

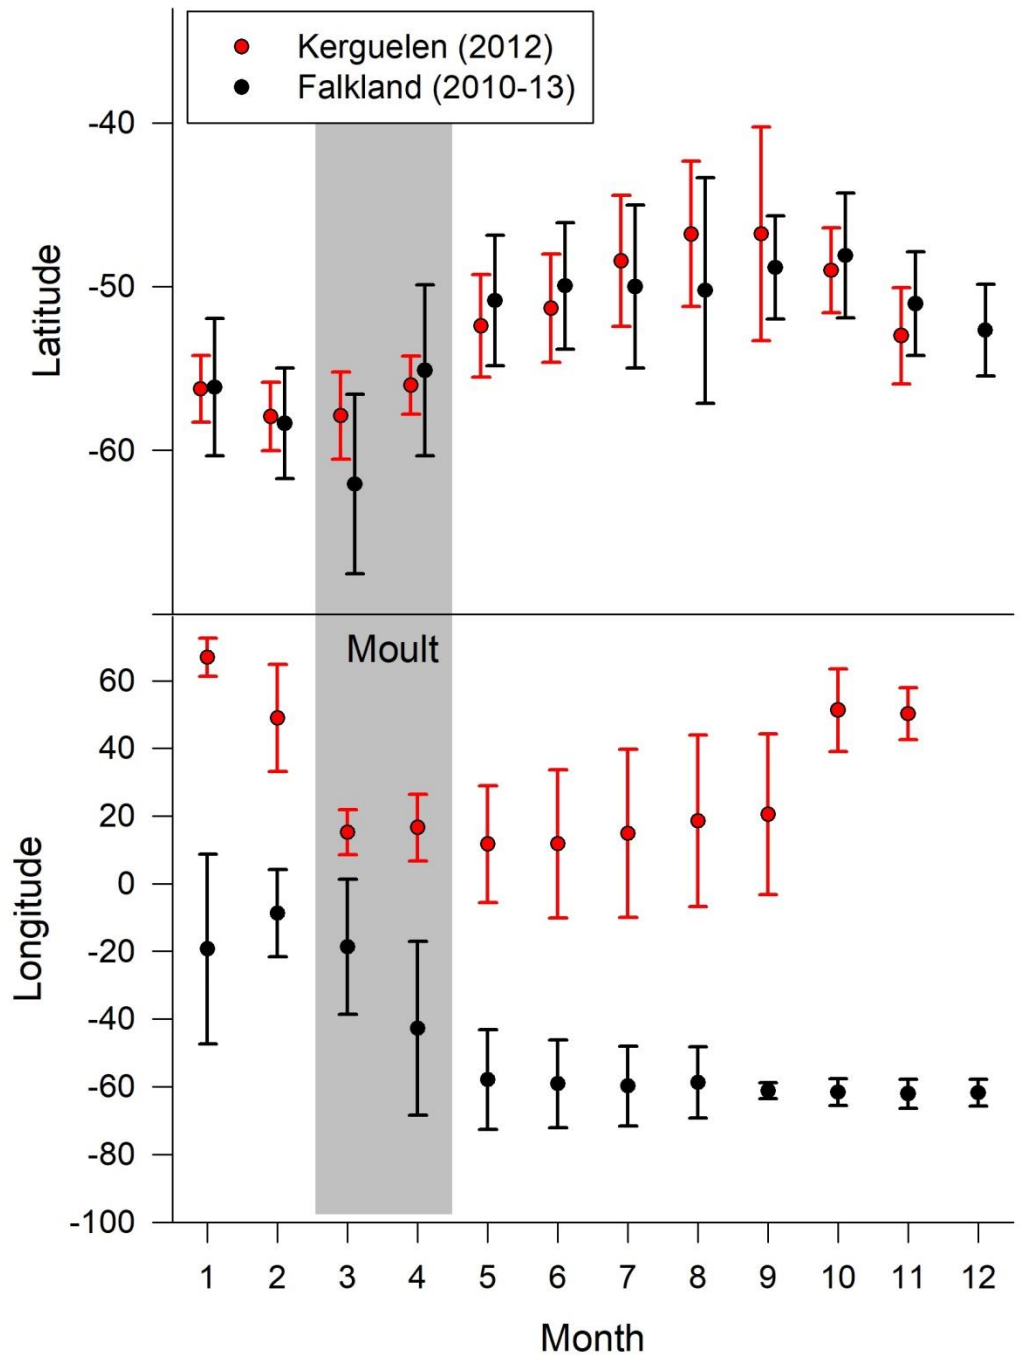

**Fig. S4.** Year-round latitudinal and longitudinal distribution of Antarctic Prions from different breeding colonies.

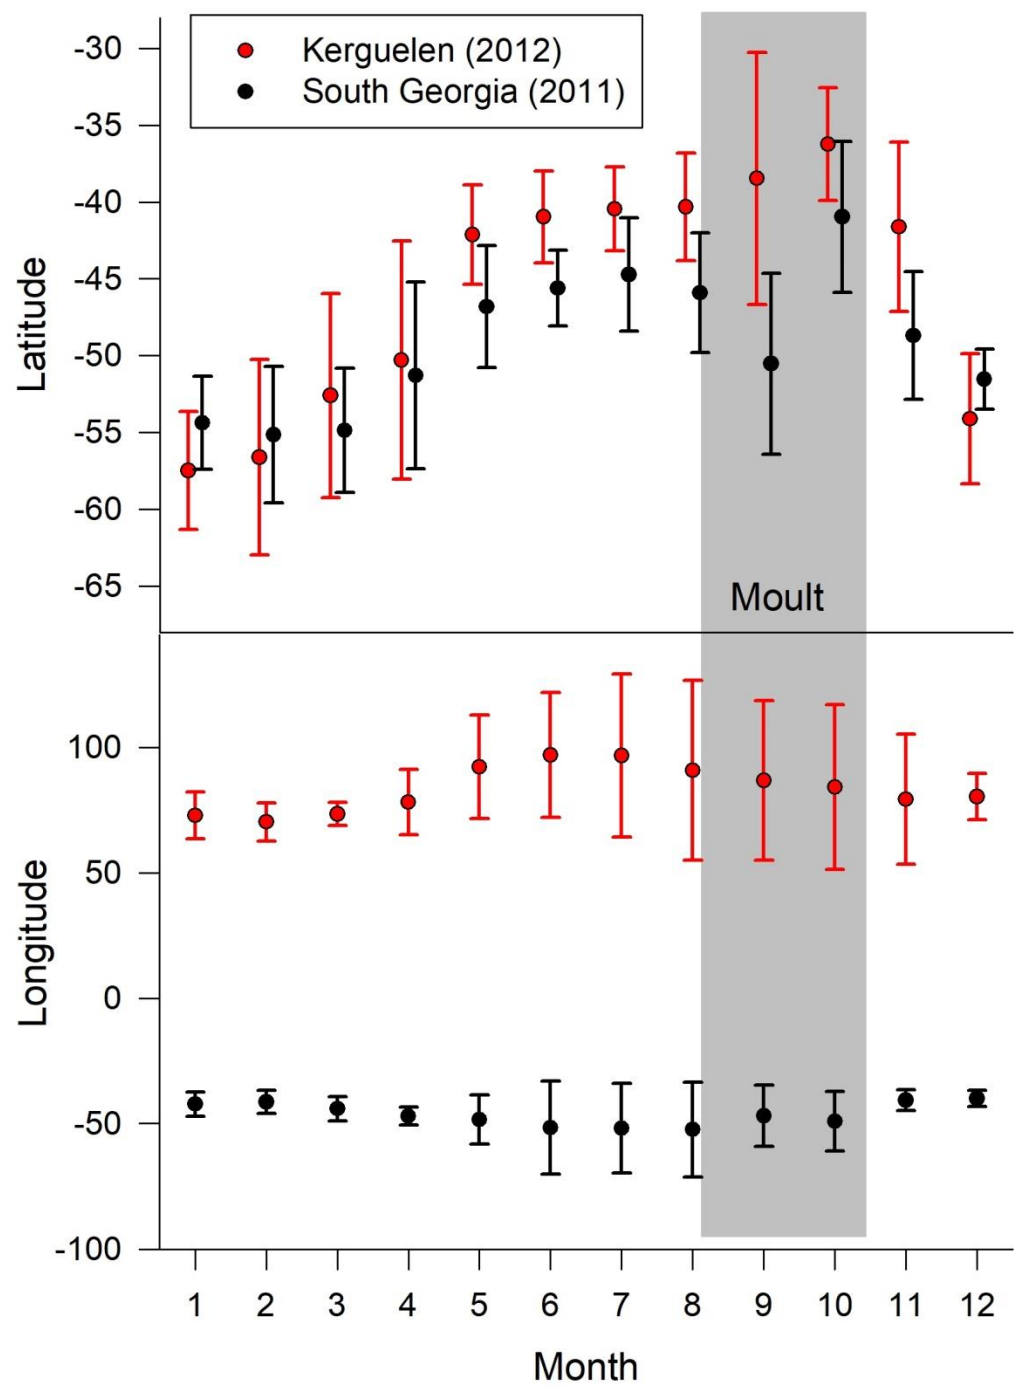

**Fig. S5.** Stable isotope values in feathers of Blue Petrels, Thin-billed Prions and Antarctic Prions. The upper panel shows the summary of seven populations, while the lower panel shows data of different years separately.

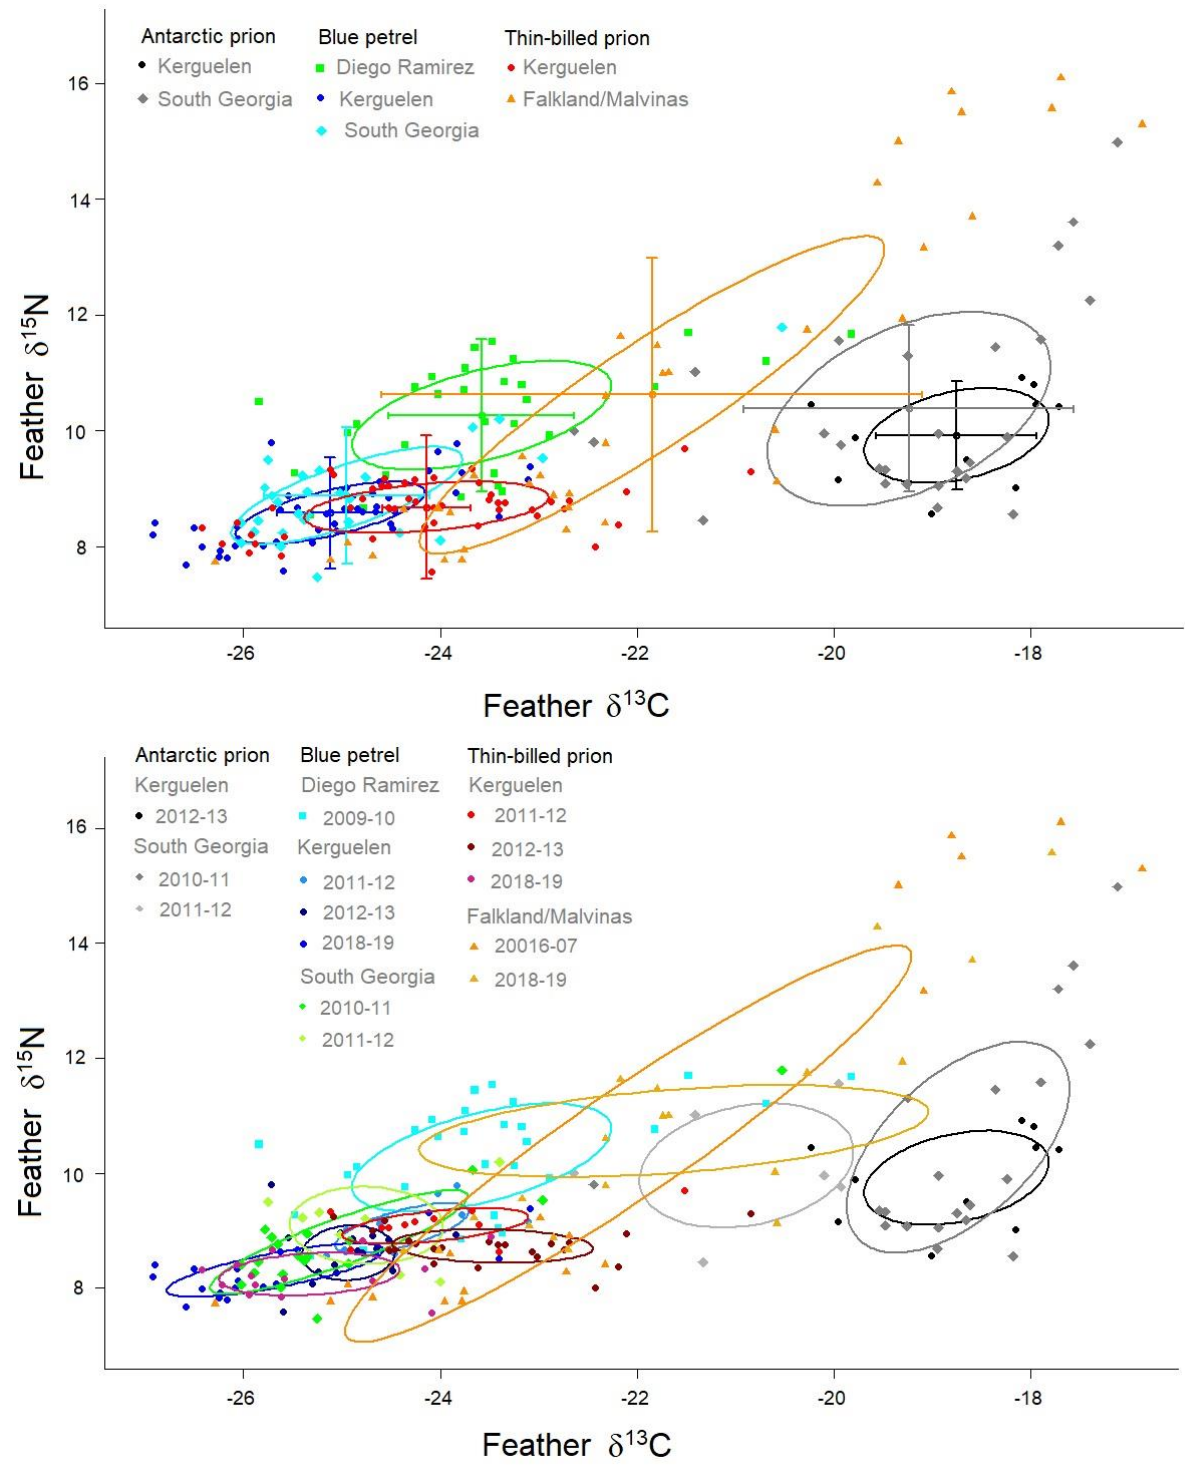

**Fig S6.** Trophic positions in feathers of Blue Petrels and Thin-billed Prions, measured with compound-specific stable isotope analysis of nitrogen stable isotope values in amino acids.

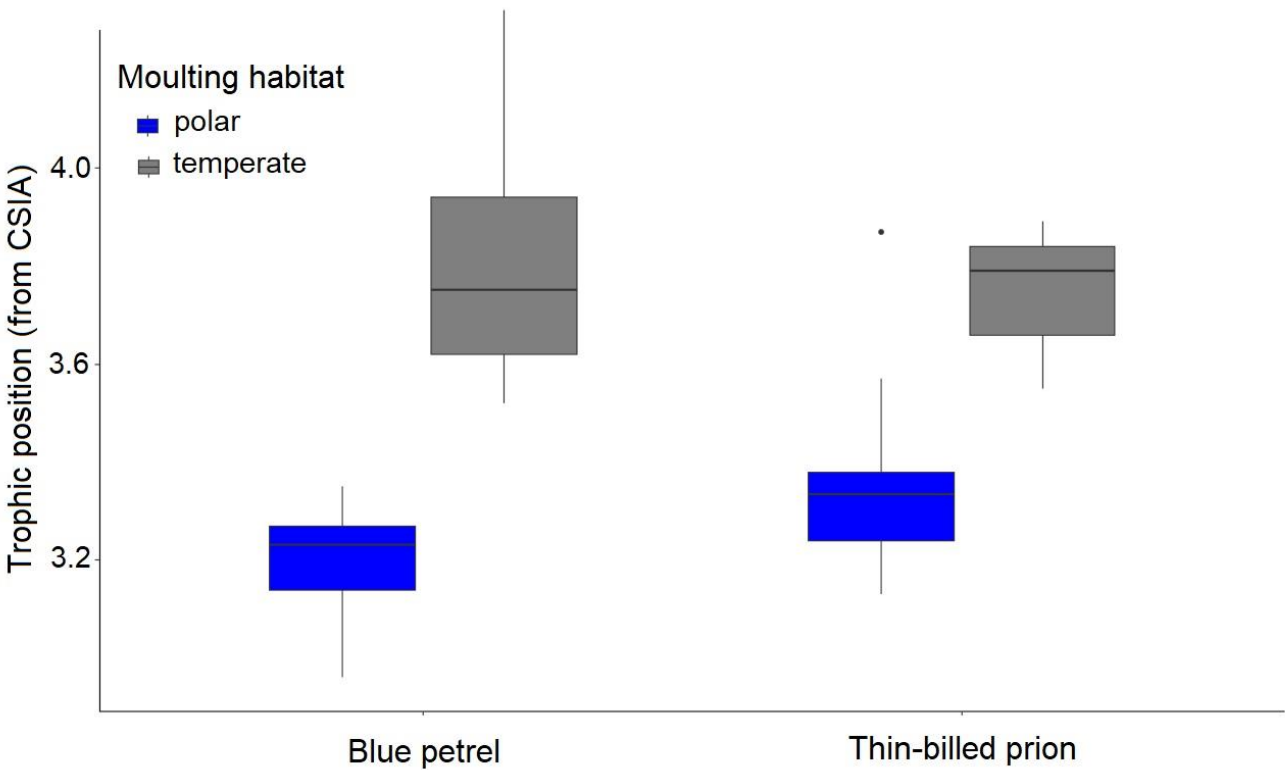

**Fig S7.** Violin plot showing the distribution of mercury in feathers of Blue Petrels, Thin-billed Prions and Antarctic Prions.

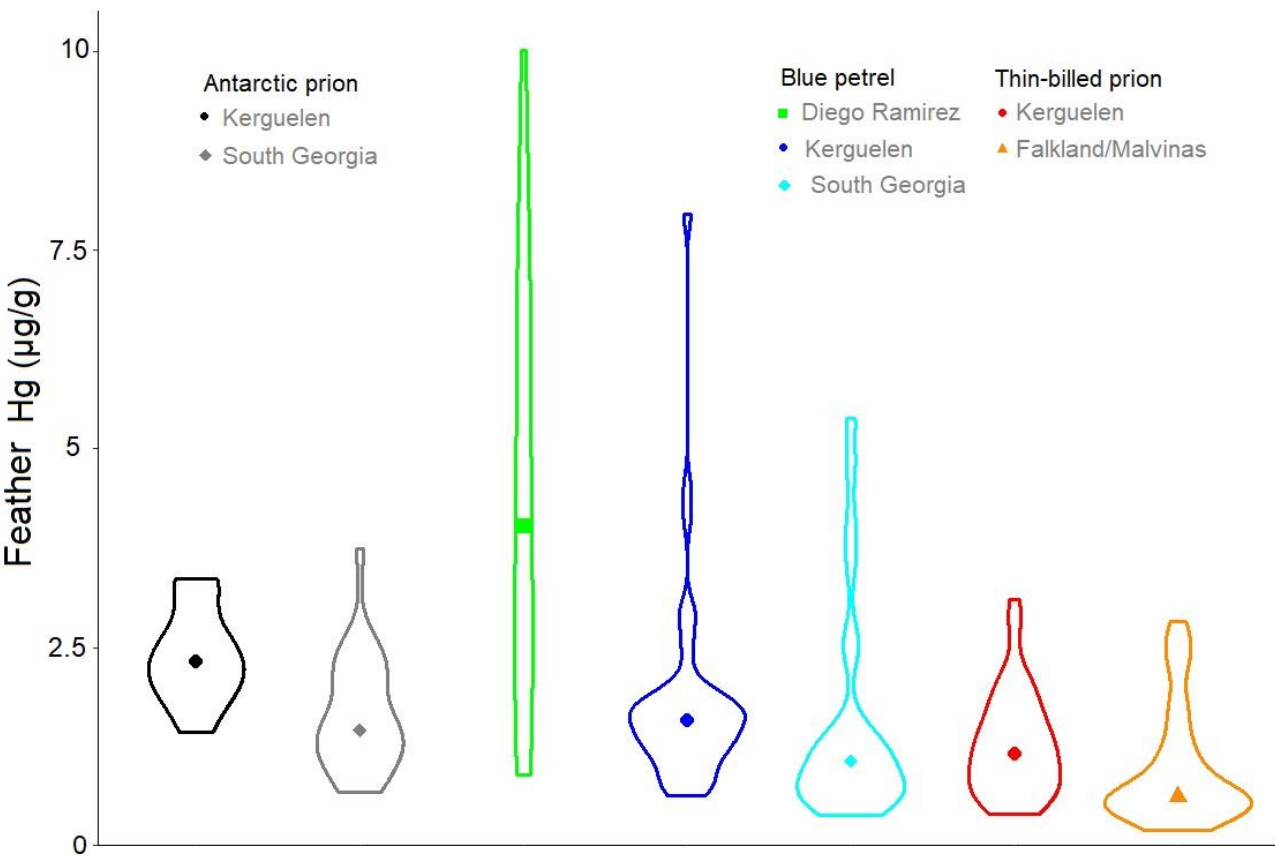

**Fig. S8.** Mercury (mean $\pm$ SD) in relation to stable isotope values in feathers of Blue Petrels, Thin-billed Prions and Antarctic Prions. A linear smoother is shown in grey shade, although a linear model ( $\text{lm}(\text{Hg} \sim \delta^{13}\text{C} + \delta^{15}\text{N}, \text{data}=\text{feathers})$ ) was not statistically significant overall ( $P=0.738$ ), for  $\delta^{13}\text{C}$  ( $P=0.600$ ) or  $\delta^{15}\text{N}$  ( $P=0.464$ ).

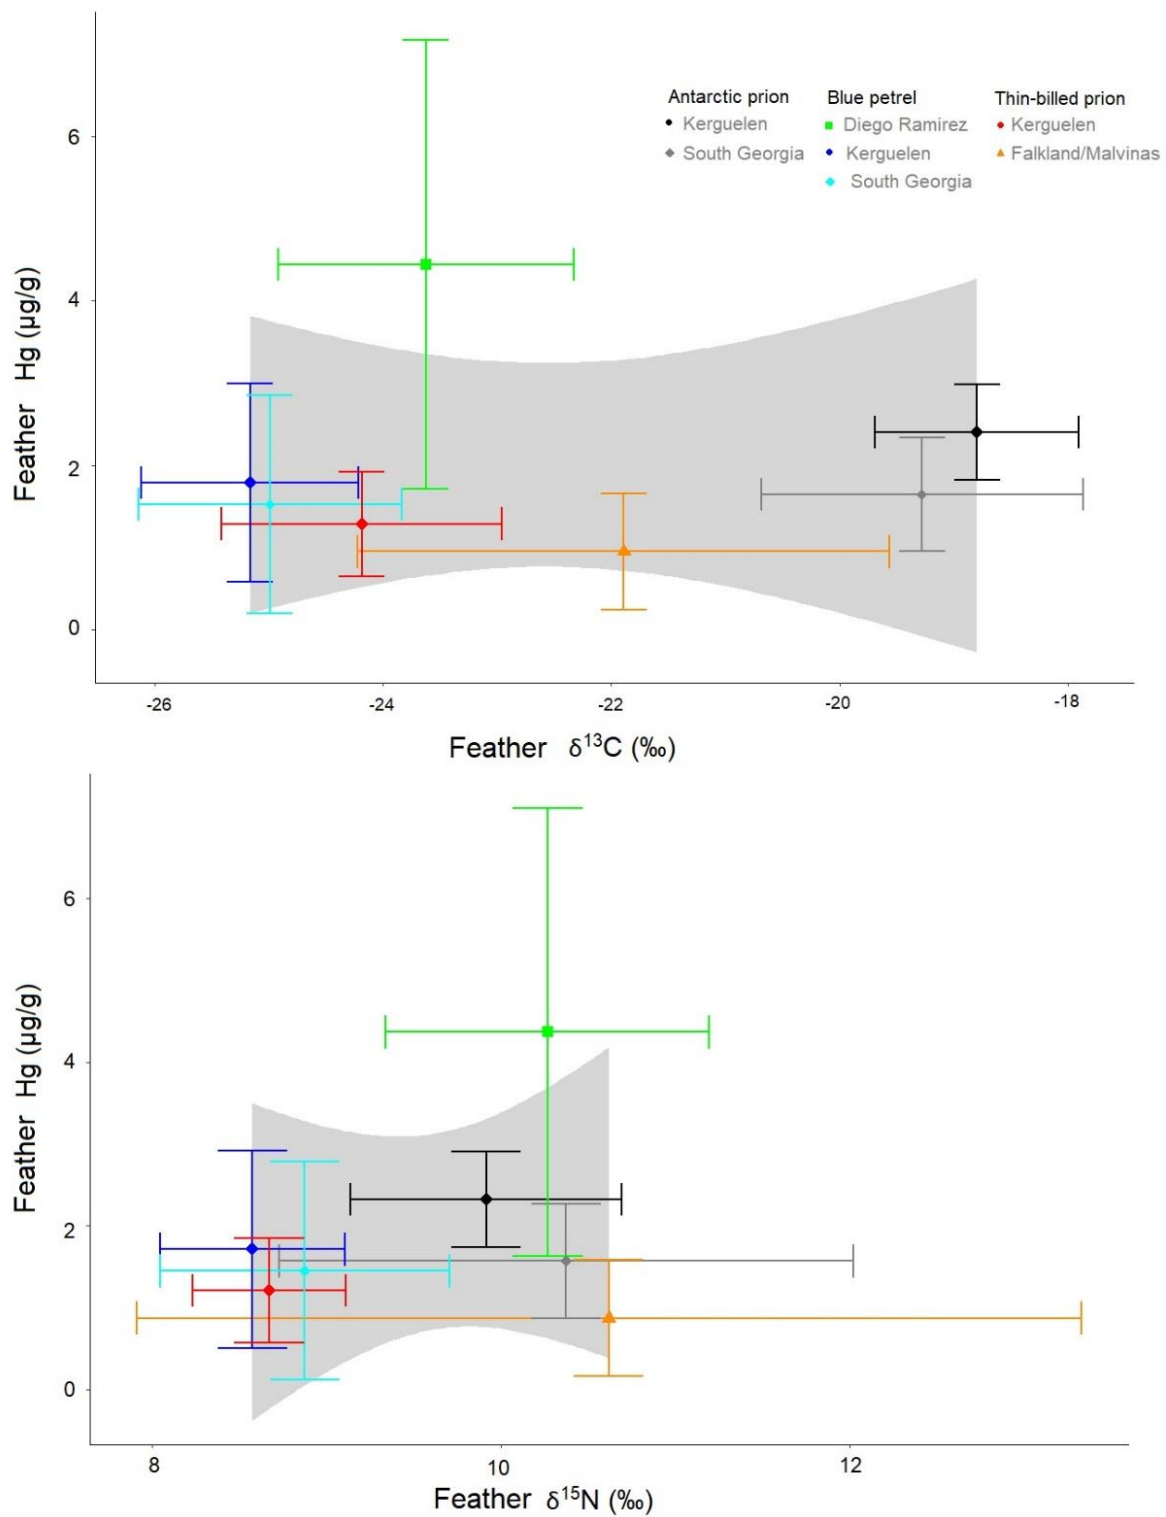

**Fig. S9.** Mercury concentrations ( $\mu\text{g/g dw}$ ) in feathers in relation to  $\delta^{13}\text{C}$  and  $\delta^{15}\text{N}$  values.

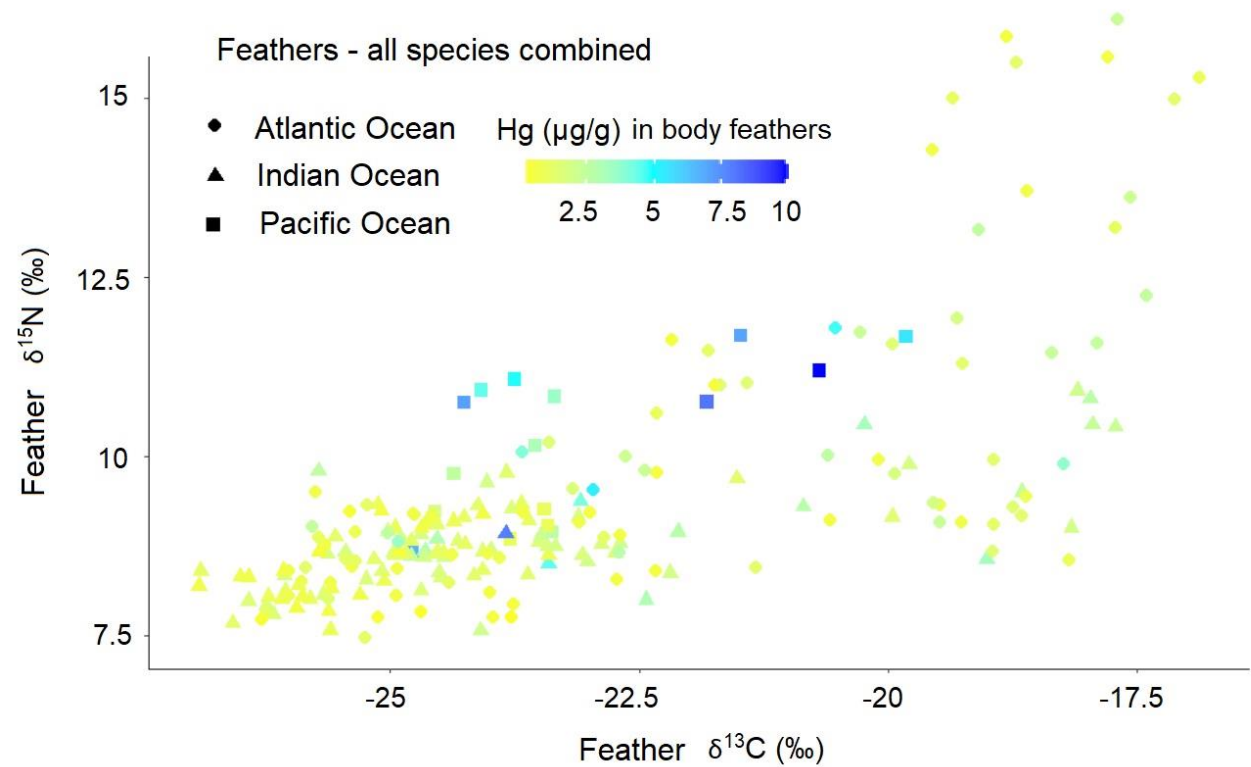



**Fig. S10.** Mercury in relation to carbon stable isotope values in blood samples of Blue Petrels, Thin-billed Prions and Antarctic Prions, shown for the incubation (a,b) and chick-rearing (c,d) periods. Grey areas show gam smoothed confidence intervals, obtained in the R package ggplot2, separately for the populations.

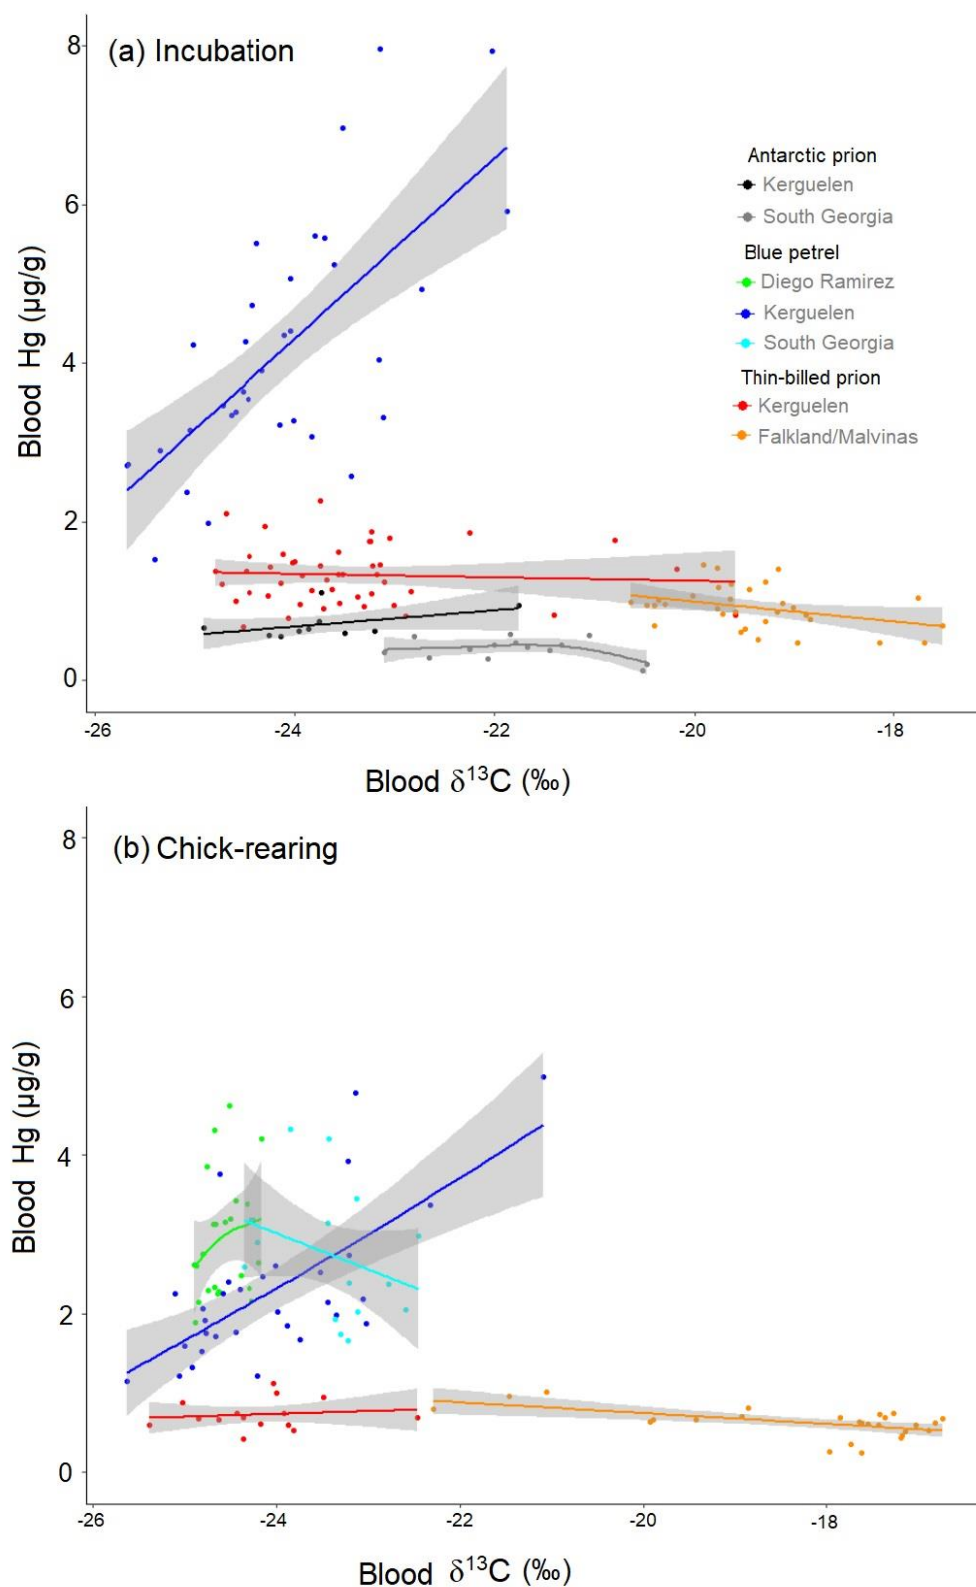

**Table S2. Previous data on mercury.** Data available from the literature for the three species: Blue Petrel, Thin-billed Prion and Antarctic Prion.

| Population               |               | Sample type |          |                 | Hg ( $\mu\text{g}\cdot\text{g}^{-1}$ dry weight); | Reference              |
|--------------------------|---------------|-------------|----------|-----------------|---------------------------------------------------|------------------------|
| Species                  | Colony site   | age         | tissue   | Collection date | mean $\pm$ SD (n)<br>range                        |                        |
| <b>Blue petrel</b>       | South Georgia | adults      | feathers | 1998            | $3.10 \pm 0.14$ (3)<br>2.96-3.24                  | Becker et al. 2002     |
|                          |               | adults      | feathers | 2001            | $2.69 \pm 1.29$ (5)<br>1.94-4.99                  | Anderson et al. 2009   |
|                          |               | adults      | blood    | 2001            | $0.56 \pm 0.28$ (2)<br>0.36–0.75                  | Anderson et al. 2009   |
|                          | Kerguelen     | adults      | feathers | 2011            | $1.05 \pm 0.720$ (25)<br>0.43-33.32               | Carravieri et al. 2014 |
|                          |               | chicks      | feather  | 2003            | $0.84 \pm 0.18$ (13)<br>0.58–1.14                 | Blévin et al. 2013     |
|                          | Marion        | adults      | feathers | 2011            | $4.62 \pm 4.11$ (9)<br>0.89-11.05                 | Becker et al. 2016     |
| <b>Thin-billed prion</b> | Kerguelen     | adults      | feathers | 2011            | $0.63 \pm 0.55$ (20)<br>0.24-2.49                 | Carravieri et al. 2014 |
|                          |               | chicks      | feathers | 2003            | $0.22 \pm 0.09$ (9)<br>0.12–0.40                  | Blévin et al. 2013     |
| <b>Antarctic prion</b>   | South Georgia | adults      | feathers | 2001            | $4.51 \pm 1.26$ (15)<br>2.58-6.82                 | Anderson et al. 2009   |
|                          |               | adults      | blood    | 2001            | $0.53 \pm 0.21$ (16)<br>0.24–1.19                 | Anderson et al. 2009   |
|                          | Kerguelen     | adults      | feathers | 2011            | $1.73 \pm 0.05$ (10)<br>1.28-2.61                 | Carravieri et al. 2014 |
|                          |               | adults      | feathers | 2012            | $2.8 \pm 1.2$ (10)                                | Fromant et al. 2016    |
|                          |               | adults      | blood    | 2012            | $0.67 \pm 0.11$ (10)                              | Fromant et al. 2016    |
|                          |               | chicks      | feathers | 2008            | $0.21 \pm 0.05$ (10)<br>0.16–0.31                 | Blévin et al. 2013     |
